# Supplementary material for: Exploring the ATN classification system using brain morphology
Source: Alzheimers Res Ther. 2023 Mar 13;15:50. doi: 10.1186/s13195-023-01185-x (PMC10009950; doi:10.1186/s13195-023-01185-x)
Supplement: Supplementary file 9 — Additional file 9. Assessment of face validity of the ACH using selected ROIs in the ADNI2 subsample. ROI based comparison of the evidence for a for monotonic volume decline over 24 sequences obtained by permutation of the ACH progression sequence. Braak stage volumes were obtained using aggregated Freesurfer ROI volumes. AP 1: A+T-N-➔A+T+N-➔A-T-N-➔A+T+N+; AP 2: A+T-N-➔A-T-N-➔A+T+N-➔A+T+N+; Other2: A-T-N- ➔ A+T+N- ➔ A+T-N- ➔ A+T+N+; Other4: A-T-N- ➔ A+T+N+ ➔ A+T+N- ➔ A+T-N-. Neurodegeneration (N) by aHV. [file 13195_2023_1185_MOESM9_ESM.xlsx]

## Sheet: Tabelle1
Region	Best sequence	T	P	ACH on rank nr. (of 24)
AMG	ACH	-8.32	8.74e-15	1
Hippocampus	Other2	-13.79	1.37e-30	2
Entorhinal Cortex	AP2	-6.50	3.65e-10	2
Precuneus	Other4	-0.51	0.3049	5
Braak I/II	ACH	-12.60	4.76e-27	1
Braak III/IV	AP2	-4.25	1.71e-05	4
Braak V/VI	AP1	-1.43	0.0778	10
